# Supplementary material
Source: publisher site journal article supplement (https://www.dovepress.com/article/310751)
Supplement: Supplementary file 1 [file get_supplementary_file.php]

**Table S1. BMI distribution in uACR groups**

| Variables | uACR < 30 mg/g | uACR ≥ 30 mg/g | P-value |
| --- | --- | --- | --- |
| BMI categorical (kg/m2) |  |  | <0.001 |
| <18.5 | 664 (4.75%) | 90 (3.40%) |  |
| 18.5-23.9 | 8677 (62.04%) | 1280 (48.41%) |  |
| 24-27.9 | 3896 (27.85%) | 918 (34.72%) |  |
| 28-29.9 | 469 (3.35%) | 207 (7.83%) |  |
| ≥30 | 281 (2.01%) | 149 (5.64%) |  |

BMI: body mass index; UACR: urinary albumin to creatinine ratio.

**Table S2. Odds of increased uACR with adiposity indices**

| Variables | Odds Ratio (95% confidence interval) P value | |
| --- | --- | --- |
| Non-adjusted | Fully Adjusted |
| WHR quartile |  |  |
| Q1 | 1.0 | 1.0 |
| Q2 | 1.13 (1.00, 1.27) 0.053 | 0.95 (0.83, 1.09) 0.447 |
| Q3 | 1.20 (1.07, 1.36) 0.002 | 0.96 (0.84, 1.10) 0.535 |
| Q4 | 1.35 (1.20, 1.53) <0.001 | 0.91 (0.79, 1.05) 0.187 |
| WHR continuious | 5.37 (3.08, 9.35) <0.001 | 0.77 (0.39, 1.55) 0.466 |
| WHtR quartile |  |  |
| Q1 | 1.0 | 1.0 |
| Q2 | 1.12 (0.98, 1.29) 0.095 | 0.98 (0.85, 1.13) 0.782 |
| Q3 | 1.59 (1.40, 1.80) <0.001 | 1.15 (0.99, 1.32) 0.063 |
| Q4 | 2.71 (2.40, 3.06) <0.001 | 1.36 (1.18, 1.57) <0.001 |
| WHtR continuious | 11.18 (5.90, 22.14) <0.001 | 1.96 (0.27, 21.14) 0.335 |
| LAP quartile |  |  |
| Q1 | 1.0 | 1.0 |
| Q2 | 1.42 (1.24, 1.62) <0.001 | 1.09 (0.94, 1.27) 0.238 |
| Q3 | 1.82 (1.59, 2.07) <0.001 | 1.13 (0.97, 1.31) 0.111 |
| Q4 | 2.78 (2.46, 3.15) <0.001 | 1.42 (1.21, 1.67) <0.001 |
| LAP continuious | 2.01 (1.03, 3.22) <0.001 | 1.34 (1.00, 1.68) <0.001 |

Non-adjusted model adjust for: None
Adjust model adjust for: Age; Sex; DM Family history; Drinking; Smoking; CVD history; SBP; DBP; HDL; FBG; PBG; HbA1c.

UACR: urinary albumin to creatinine ratio; WHR: waist circumstance to hip circumstance ratio; WHtR: waist circumstance to height ratio; LAP: lipid accumulation product index; BMI: body mass index; DM: diabetes mellitus; CVD: cardiovascular disease; SBP: systolic blood pressure; DBP: diastolic blood pressure; HDL: high-density lipoprotein cholesterol; FBG: fasting blood glucose; PBG: 2 h post-load blood glucose; HbA1c: glycosylated hemoglobin.

**Table S3. Odds of increased uACR with lipid parameters**

| Variables | Odds Ratio (95% confidence interval) P value | | | |
| --- | --- | --- | --- | --- |
| Model1 | Model2 | Model3 | Model4 |
| **Men** |  |  |  |  |
| TG category |  |  |  |  |
| <1.7 | 1.0 | 1.0 | 1.0 | 1.0 |
| 1.7-2.3 | 1.10 (0.84, 1.43) 0.496 | 1.03 (0.78, 1.35) 0.840 | 0.99 (0.75, 1.31) 0.957 | 0.95 (0.71, 1.26) 0.708 |
| ≥2.3 | **1.35 (1.07, 1.69) 0.011** | **1.40 (1.10, 1.79) 0.006** | **1.33 (1.03, 1.70) 0.026** | **1.12 (1.03, 1.51) 0.042** |
| TC category |  |  |  |  |
| <5.2 | 1.0 | 1.0 | 1.0 | 1.0 |
| 5.2-6.2 | 1.04 (0.84, 1.28) 0.727 | 1.00 (0.80, 1.24) 0.988 | 1.00 (0.80, 1.24) 0.985 | 0.92 (0.73, 1.16) 0.475 |
| ≥6.2 | 0.80 (0.56, 1.15) 0.221 | 0.88 (0.61, 1.27) 0.485 | 0.87 (0.60, 1.27) 0.479 | 0.75 (0.51, 1.10) 0.139 |
| HDL category |  |  |  |  |
| <1 | 1.31 (1.07, 1.60) 0.007 | 1.23 (1.00, 1.51) 0.050 | 1.19 (0.96, 1.46) 0.111 | 1.21 (0.98, 1.51) 0.080 |
| ≥1 | 1.0 | 1.0 | 1.0 | 1.0 |
| LDL category |  |  |  |  |
| <3.4 | 1.0 | 1.0 | 1.0 | 1.0 |
| 3.4-4.1 | 0.99 (0.77, 1.27) 0.927 | 0.92 (0.71, 1.18) 0.514 | 0.92 (0.71, 1.19) 0.516 | 0.86 (0.66, 1.12) 0.250 |
| ≥4.1 | 0.80 (0.53, 1.20) 0.279 | 0.83 (0.55, 1.26) 0.377 | 0.85 (0.56, 1.28) 0.432 | 0.76 (0.50, 1.17) 0.211 |
| **Female** |  |  |  |  |
| TG category |  |  |  |  |
| <1.7 | 1.0 | 1.0 | 1.0 | 1.0 |
| 1.7-2.3 | 1.54 (1.35, 1.75) <0.001 | 1.21 (1.05, 1.38) 0.006 | 1.17 (1.02, 1.34) 0.029 | 1.10 (0.95, 1.27) 0.189 |
| ≥2.3 | **1.82 (1.59, 2.10) <0.001** | **1.33 (1.15, 1.54) 0.001** | **1.26 (1.09, 1.47) 0.002** | **1.18 (1.00, 1.35) 0.026** |
| TC category |  |  |  |  |
| <5.2 | 1.0 | 1.0 | 1.0 | 1.0 |
| 5.2-6.2 | 1.07 (0.96, 1.19) 0.215 | 0.95 (0.85, 1.06) 0.338 | 0.94 (0.84, 1.06) 0.311 | 0.88 (0.78, 0.98) 0.025 |
| ≥6.2 | 1.04 (0.89, 1.22) 0.587 | 0.86 (0.73, 1.01) 0.058 | 0.86 (0.73, 1.01) 0.066 | 0.98 (0.66, 1.32) 0.053 |
| HDL category |  |  |  |  |
| <1 | **1.26 (1.09, 1.45) 0.001** | **1.20 (1.04, 1.39) 0.015** | **1.18 (1.01, 1.37) 0.031** | **1.14 (1.06, 1.45) 0.026** |
| ≥1 | 1.0 | 1.0 | 1.0 | 1.0 |
| LDL category |  |  |  |  |
| <3.4 | 1.0 | 1.0 | 1.0 | 1.0 |
| 3.4- 4.1 | 1.08 (0.95, 1.23) 0.211 | 0.94 (0.82, 1.07) 0.345 | 0.95 (0.83, 1.09) 0.440 | 0.89 (0.77, 1.02) 0.088 |
| ≥4.1 | 0.95 (0.78, 1.15) 0.601 | **0.79 (0.64, 0.96) 0.020** | **0.88 (0.64, 1.26) 0.119** | 0.92 (0.88, 1.29) 0.212 |
| **Total** |  |  |  |  |
| TG category |  |  |  |  |
| <1.7 | 1.0 | 1.0 | 1.0 | 1.0 |
| 1.7-2.3 | **1.43 (1.28, 1.61) <0.001** | **1.17 (1.03, 1.32) 0.013** | 1.13 (1.00, 1.27) 0.054 | 1.06 (0.94, 1.20) 0.359 |
| ≥2.3 | **1.68 (1.49, 1.89) <0.001** | **1.35 (1.19, 1.53) <0.001** | **1.28 (1.13, 1.46) 0.001** | **1.15 (1.01, 1.31) 0.040** |
| TC category |  |  |  |  |
| <5.2 | 1.0 | 1.0 | 1.0 | 1.0 |
| 5.2-6.2 | 1.06 (0.97, 1.17) 0.215 | 0.96 (0.87, 1.06) 0.403 | 0.96 (0.86, 1.06) 0.375 | 0.88 (0.80, 0.98) 0.019 |
| ≥6.2 | 1.00 (0.87, 1.15) 0.984 | **0.86 (0.75, 1.00) 0.0487** | 0.86 (0.74, 1.00) 0.052 | 0.97 (0.66, 1.29) 0.111 |
| HDL category |  |  |  |  |
| <1 | **1.28 (1.14, 1.43) <0.001** | **1.21 (1.07, 1.36) 0.001** | **1.18 (1.05, 1.33) 0.007** | **1.13 (1.09, 1.30) 0.011** |
| ≥1 | 1.0 | 1.0 | 1.0 | 1.0 |
| LDL category |  |  |  |  |
| <3.4 | 1.0 | 1.0 | 1.0 | 1.0 |
| 3.4-4.1 | 1.06 (0.95, 1.19) 0.288 | 0.93 (0.83, 1.05) 0.261 | 0.94 (0.84, 1.06) 0.336 | 0.88 (0.78, 1.09) 0.059 |
| ≥4.1 | 0.92 (0.77, 1.09) 0.336 | **0.80 (0.66, 0.96) 0.014** | **0.82 (0.68, 0.97) 0.025** | 0.79 (0.60, 1.01) 0.051 |

Model 1 adjust for: None
Model 2 adjust for: Age; Sex; BMI
Model 3 adjust for: Age; Sex; BMI; DM Family history; Drinking; Smoking; CVD history

Model 4 adjust for: Age; Sex; BMI; DM Family history; Drinking; Smoking; CVD history; SBP; DBP; HDL; FBG; PBG; HbA1c.

UACR: urinary albumin to creatinine ratio; WHR: waist circumstance to hip circumstance ratio; WHtR: waist circumstance to height ratio; LAP: lipid accumulation product index; BMI: body mass index; DM: diabetes mellitus; CVD: cardiovascular disease; SBP: systolic blood pressure; DBP: diastolic blood pressure; HDL: high-density lipoprotein cholesterol; FBG: fasting blood glucose; PBG: 2 h post-load blood glucose; HbA1c: glycosylated hemoglobin.
